# Supplementary material
Source: Research Square preprint supplement (doi:10.21203/rs.3.rs-9893848/v1)
Supplement: Supplementary file 1 [file 99467ed021603c9d37df5ae5.docx]

# Supplementary data

[**1) Supplementary file 1 Search strategy 1**](#_64hhhlzeji09)

[**2) Included studies 3**](#_9u6mjl1zupbn)

[**3) Table S1: Characteristics of included studies (n = 23) 7**](#_47bn7uj9xnaf)

[**4) Table S2: Intervention details (n = 23) 14**](#_t97strs9hbcp)

[**5) Table S3: Intervention components 25**](#_asf828wz64d4)

# Supplementary file 1 Search strategy

**PubMed**: 406 hits, 13 April 2026

(((("adolescent"[MeSH Terms] OR "adolescent health"[MeSH Terms] OR "adolescent"[Title/Abstract] OR "adolescence"[Title/Abstract] OR "young adults"[Title/Abstract] OR "puberty"[Title/Abstract] OR "pre-puberty"[Title/Abstract] OR "children"[Title/Abstract] OR "child"[Title/Abstract] OR "girl"[Title/Abstract] OR "boy"[Title/Abstract] OR "teenag*"[Title/Abstract] OR "pre-teen"[Title/Abstract] OR "youth"[Title/Abstract] OR "young adult"[Title/Abstract]) AND ("noncommunicable diseases"[MeSH Terms] OR "metabolic diseases"[MeSH Terms] OR "hypertension"[MeSH Terms] OR "diabetes mellitus"[MeSH Terms] OR "substance related disorders"[MeSH Terms] OR "hypercholesterolemia"[MeSH Terms] OR "non-communicable disease"[Title/Abstract] OR "NCD"[Title/Abstract] OR "metabolic disease"[Title/Abstract] OR "hypertension"[Title/Abstract] OR "blood pressure"[Title/Abstract] OR "obesity"[Title/Abstract] OR "overweight"[Title/Abstract] OR "chronic disease"[Title/Abstract] OR "diabetes"[Title/Abstract] OR "hyperglycemia"[Title/Abstract] OR "glucose intolerance"[Title/Abstract] OR "mental health"[Title/Abstract] OR "sedentary habit"[Title/Abstract] OR "tobacco consumption"[Title/Abstract] OR "alcohol consumption"[Title/Abstract] OR "alcohol use"[Title/Abstract] OR "substance use"[Title/Abstract] OR "poor diet"[Title/Abstract] OR "unhealthy diet"[Title/Abstract] OR "physical inactivity"[Title/Abstract] OR "hypercholesterolemia"[Title/Abstract] OR Sedentary Behavior[Mesh Terms])) AND ("asia, southern"[MeSH Terms] OR "India"[MeSH Terms] OR "Nepal"[MeSH Terms] OR "Bangladesh"[MeSH Terms] OR "Bhutan"[MeSH Terms] OR "sri lanka"[MeSH Terms] OR "Afghanistan"[MeSH Terms] OR "Pakistan"[MeSH Terms] OR "Maldives"[MeSH Terms] OR "South Asia"[Title/Abstract] OR "Southern Asia"[Title/Abstract] OR "Indian subcontinent"[Title/Abstract] OR "India"[Title/Abstract] OR "Nepal"[Title/Abstract] OR "Bhutan"[Title/Abstract] OR "Bangladesh"[Title/Abstract] OR "Pakistan"[Title/Abstract] OR "Afghanistan"[Title/Abstract] OR "sri lanka"[Title/Abstract] OR "Maldives"[Title/Abstract] OR "South Asian Association for Regional Cooperation"[Title/Abstract] OR "SAARC"[Title/Abstract] OR "South Asian region"[Title/Abstract] OR "Himalayan region"[Title/Abstract])) AND ("Health Promotion"[MeSH Terms] OR "School Health Services"[MeSH Terms] OR "Diet"[MeSH Terms] OR "diet, carbohydrate restricted"[MeSH Terms] OR "diet, mediterranean"[MeSH Terms] OR "diet, fat restricted"[MeSH Terms] OR "diet, sodium restricted"[MeSH Terms] OR "diet, reducing"[MeSH Terms] OR "Diet Therapy"[MeSH Terms] OR "Weight Reduction Programs"[MeSH Terms] OR "Health Education"[MeSH Terms] OR "Nutrition Policy"[MeSH Terms] OR "Exercise"[MeSH Terms] OR "Exercise Therapy"[MeSH Terms] OR "Healthy Lifestyle"[MeSH Terms] OR "Internet-Based Intervention"[MeSH Terms] OR "Play Therapy"[MeSH Terms] OR "Behavior Therapy"[MeSH Terms] OR "Educational Technology"[MeSH Terms] OR "Virtual Reality"[MeSH Terms] OR "Yoga"[MeSH Terms] OR "Laughter Therapy"[MeSH Terms] OR "Risk Reduction Behavior"[MeSH Terms] OR "Smoking Cessation"[MeSH Terms] OR "Smoking Prevention"[MeSH Terms] OR "Smoking Reduction"[MeSH Terms] OR "Tobacco Control"[MeSH Terms] OR "Smoke-Free Policy"[MeSH Terms] OR "Social Marketing"[MeSH Terms] OR "Harm Reduction"[MeSH Terms] OR "games, experimental"[MeSH Terms] OR ("health promotion"[Title/Abstract] OR "dietary practice"[Title/Abstract] OR "normal diet"[Title/Abstract] OR "weight reduction"[Title/Abstract] OR "health education"[Title/Abstract] OR "health practices"[Title/Abstract] OR nutrition[Title/Abstract] OR "nutrition education"[Title/Abstract] OR "nutrition policy"[Title/Abstract] OR "physical activity"[Title/Abstract] OR exercise[Title/Abstract] OR "fitness training"[Title/Abstract] OR play[Title/Abstract] OR "healthy habits"[Title/Abstract] OR "health policies"[Title/Abstract] OR "school-based policies"[Title/Abstract] OR "school-based strategies"[Title/Abstract] OR "school-based interventions"[Title/Abstract] OR "multicomponent interventions"[Title/Abstract] OR interventions[Title/Abstract] OR strategies[Title/Abstract] OR "educational programs"[Title/Abstract] OR "educational programmes"[Title/Abstract] OR "educational intervention"[Title/Abstract] OR "Behaviour Change"[Title/Abstract] OR "behavioural intervention"[Title/Abstract] OR "behavioral intervention"[Title/Abstract] OR "healthy school environment"[Title/Abstract] OR "community engagement"[Title/Abstract] OR "risk factor management"[Title/Abstract] OR yoga[Title/Abstract] OR "educational package"[Title/Abstract] OR "behavioural modification"[Title/Abstract] OR "behavioral modification"[Title/Abstract] OR "lifestyle management"[Title/Abstract] OR "life skills education"[Title/Abstract] OR "life style intervention"[Title/Abstract] OR "lifestyle modifications"[Title/Abstract] OR "lifestyle education"[Title/Abstract] OR "alcohol use prevention"[Title/Abstract] OR "tobacco control"[Title/Abstract] OR "tobacco free"[Title/Abstract] OR "social marketing interventions"[Title/Abstract] OR "advertising bans"[Title/Abstract] OR "smoking ban"[Title/Abstract] OR "harm minimization"[Title/Abstract]))) AND ("randomized controlled trials as topic"[MeSH Terms] OR "clinical trials as topic"[MeSH Terms] OR "randomized controlled trial"[Publication Type] OR "clinical trial"[Publication Type] OR "randomized controlled trial"[Title/Abstract] OR "controlled clinical trial"[Title/Abstract] OR "clinical trial"[Title/Abstract] OR "random allocation"[Title/Abstract] OR "randomised controlled trials"[Title/Abstract] OR "double-blind method"[Title/Abstract] OR "single-blind method"[Title/Abstract] OR "quasi experimental stud*"[Title/Abstract] OR "evaluation studies"[Title/Abstract] OR "follow-up studies"[Title/Abstract] OR "crossover studies"[Title/Abstract] OR "feasibility stud*"[Title/Abstract] OR "controlled before after"[Title/Abstract] OR "process evaluation"[Title/Abstract] OR "outcome evaluation"[Title/Abstract] OR "program evaluations"[Title/Abstract])

# Included studies

1. [Ahmed KR, Kolbe-Alexander T, Khan A. Efficacy of a school-based education intervention on the consumption of fruits, vegetables and carbonated soft drinks among adolescents. Public Health Nutr. 2023;26: 3112–3121.](https://www.zotero.org/google-docs/?xc52M9)

**Linked publications:** [Ahmed KR, Horwood S, Kolbe-Alexander T, Khan A. Effects of a School-Based Physical Activity Intervention on Adolescents’ Mental Health: A Cluster Randomized Controlled Trial. J Phys Act Health 2023a;20: 1102–1108.](https://www.zotero.org/google-docs/?xc52M9)

Ahmed KR, Kolbe-Alexander T, Khan A. Effectiveness of a school-based intervention on physical activity and screen time among adolescents. Journal of science and medicine in sport. 2022;25(3):242-8.

1. [Nayak BS, Bhat VH. School Based Multicomponent Intervention for Obese Children in Udupi District, South India – A Randomized Controlled Trial. J Clin Diagn Res. Epub ahead of print 2016. DOI: 10.7860/JCDR/2016/23766.9116.](https://www.zotero.org/google-docs/?xc52M9)
2. [Anjana RM, Nitika S, Jagannathan N, Vinothini D, Yuvarani K, Mohan V et al. A Novel High-Intensity Short Interval Dance Intervention (THANDAV) for Non-Communicable Disease Prevention Tailored to Asian Indian Adolescent Girls. J Diabetes Sci Technol. 2025;19: 1035–1050.](https://www.zotero.org/google-docs/?xc52M9)
3. [Hossain S. Development and evaluation of a brief school-based intervention to prevent tobacco initiation and promote the health and well-being of adolescents in Dhaka, Bangladesh. University College London. 2025. Available from: https://discovery.ucl.ac.uk/id/eprint/10211764/](https://www.zotero.org/google-docs/?xc52M9)
4. Kaur S, Kumar R, Lakshmi PVM, Kaur M et al. Effectiveness of a school-based behavioural change intervention in reducing chronic disease risk factors in Chandigarh, India: a cluster-randomised controlled trial. Lancet Reg Health - Southeast Asia. 2024;21: 100353.

**Linked publication:** Kaur S, Kaur M, Kumar R. Health promotion intervention to prevent risk factors of chronic diseases: Protocol for a cluster randomized controlled trial among adolescents in school settings of Chandigarh (India). PLOS ONE. 2022;17: e0263584.

1. Kaur S, Kumar R, Kaur M. School-based behaviour change intervention to reduce ultra-processed food consumption among adolescents: evidence from a cluster-randomised controlled trial in India. BMJ Glob Health. Epub ahead of print 2026. DOI: 10.1136/bmjgh-2025-020799.
2. [Hamdani SU, Huma Z, Malik A, Tamizuddin-Nizami A, Javed H, Minhas FA et al. Effectiveness of a group psychological intervention to reduce psychosocial distress in adolescents in Pakistan: a single-blind, cluster randomised controlled trial. Lancet Child Adolesc Health. 2024;8: 559–570.](https://www.zotero.org/google-docs/?xc52M9)
3. [Bandyopadhyay N, Majumder S, Das T. Evaluating the Impact of a Physical Activity-Based Behavior Modification Program on Health-Related Fitness in Obese School Boys. Stud Sport; 19. Epub ahead of print 2025. DOI: 10.5817/StS2025-2-14.](https://www.zotero.org/google-docs/?xc52M9)
4. [Ponnambalam S, Palanisamy S, Singaravelu R, Janardhanan HA. Effectiveness of After-School Physical Activity Intervention on Body Mass Index and Waist Circumference/Height Ratio among Overweight Adolescents in Selected Schools at Puducherry, India: A Randomized Controlled Trial. Indian J Community Med Off Publ Indian Assoc Prev Soc Med. 2022;47: 72–75](https://www.zotero.org/google-docs/?xc52M9)
5. [Patel K, Deshpande A, Jain A, Shah Y, Kalyan P. Tobacco cessation effects on oral health by group and individualized motivational therapy in 12 to 18 years old boys - A randomized controlled study. J Indian Soc Pedod Prev Dent. 2020;38: 280–288.](https://www.zotero.org/google-docs/?xc52M9)
6. [Rao A, Rungta N, Nandini M, Unnikrishnan B, Shenoy R, Rao A et al. Effect of educational intervention in reducing exposure to second hand tobacco smoke among 12-year-old children as determined by their salivary cotinine levels and knowledge, attitude and behavior - a randomized controlled trial. Front Oral Health. Epub ahead of print. 2023. DOI: 10.3389/froh.2023.1277307.](https://www.zotero.org/google-docs/?xc52M9)
7. [Mahajan A, Negi PC, Gandhi S, Sharma D, Grover N. Impact of School-Based Health Behavioral Intervention on Awareness, Practice Pattern of Healthy Lifestyle, and Cardiometabolic Risk Factors among School Children of Shimla: A Cluster-Randomized, Intervention Study. Indian J Pediatr. 2022;89: 343–350.](https://www.zotero.org/google-docs/?xc52M9)
8. Leventhal KS, DeMaria LM, Gillham J, Andrew G, Peabody JW, Leventhal S. Fostering emotional, social, physical and educational wellbeing in rural India: the methods of a multi-arm randomized controlled trial of Girls First. Trials. 2015a; 16: 481.

**Linked publication:** Leventhal KS, Gillham J, DeMaria L, Andrew G, Peabody J, Leventhal S. Building psychosocial assets and wellbeing among adolescent girls: A randomized controlled trial. J Adolesc. 2015b; 45: 284–295.

1. [Moitra P, Madan J, Verma P. Impact of a behaviourally focused nutrition education intervention on attitudes and practices related to eating habits and activity levels in Indian adolescents. Public Health Nutr. 2021;24: 2715–2726.](https://www.zotero.org/google-docs/?xc52M9)
2. [Rizvi JZ, Kumar P, Kulkarni MM, Kamath Al. Outcome of structured health education intervention for obesity-risk reduction among junior high school students: Stratified cluster randomized controlled trial (RCT) in South India. J Educ Health Promot. 2022;11: 400.](https://www.zotero.org/google-docs/?xc52M9)
3. [Rentala S, Thimmajja SG, Tilekar SD, Nayak RB, Aladakatti R et al. Impact of holistic stress management program on academic stress and well-being of Indian adolescent girls: A randomized controlled trial. J Educ Health Promot. 2019;8: 253.](https://www.zotero.org/google-docs/?xc52M9) .
4. Rozi S, Zahid N, Roome T, Lakhdir MP, Sawani S, Razzak A, Butt ZA. Effectiveness of a school based smokeless tobacco intervention: a cluster randomized trial. Journal of community health. 2019 Dec;44(6):1098-110.
5. [Saraf DS, Gupta SK, Pandav CS, Nongkinrih B, Kapoor SK, Pradhan SK et al. Effectiveness of a school based intervention for prevention of non-communicable diseases in middle school children of rural North India: a randomized controlled trial. Indian J Pediatr. 2015;82: 354–362.](https://www.zotero.org/google-docs/?xc52M9) .
6. [Singhal N, Misra A, Shah P, Gulati S. Effects of controlled school-based multi-component model of nutrition and lifestyle interventions on behavior modification, anthropometry and metabolic risk profile of urban Asian Indian adolescents in North India. Eur J Clin Nutr. 2010;64: 364–373.](https://www.zotero.org/google-docs/?xc52M9)

**Linked publication:** [Singhal N, Misra A, Shah P, Gulati S, Bhatt S, Sharma S et al. Impact of intensive school-based nutrition education and lifestyle interventions on insulin resistance, β-cell function, disposition index, and subclinical inflammation among Asian Indian adolescents: a controlled intervention study. Metab Syndr Relat Disord. 2011;9: 143–150.](https://www.zotero.org/google-docs/?xc52M9)

1. [Mall ASK, Bhagyalaxmi A. An Informal School–based, Peer-led Intervention for Prevention of Tobacco Consumption in Adolescence: A Cluster Randomized Trial in Rural Gandhinagar. Indian J Community Med. 2017;42: 143–146.](https://www.zotero.org/google-docs/?xc52M9)
2. Srivastav P, Vaishali K, Bhat HV, Broadbent S et al. Effect of a pragmatic lifestyle modification intervention on physical activity levels and body mass index among obese and overweight adolescents in Udupi, India: a cluster randomized trial. F1000Research 2024;13: 859.
   **Linked publication:** Srivastav P, Vaishali K, Bhat HV, Broadbent S et al. Impact of physical activity and BMI on health-related quality of life in overweight Indian adolescents: A randomized controlled study. Obes Pillars. 2025;16: 100201.

Srivastav P, Vaishali K, Bhat VH, Broadbent S. Structured, multifactorial randomised controlled intervention to investigate physical activity levels, body composition and diet in obese and overweight adolescents. BMJ Open. 2021;11: e044895.

1. [Thakur JS, Bharti B, Tripathy JP, Dhawan V, Bhansali A et al. Impact of 20 Week Lifestyle Intervention Package on Anthropometric Biochemical and Behavioral Characteristics of Schoolchildren in North India. J Trop Pediatr. 2016;62: 368–376.](https://www.zotero.org/google-docs/?xc52M9)
2. Perry CL, Stigler MH, Arora M, Reddy KS. Preventing tobacco use among young people in India: Project MYTRI. American journal of public health. 2009 May;99(5):899-906.

**Linked publication:** [Mishra A, Arora M, Stigler MH, Komro KA, Lytle LA, Reddy KS et al. Indian youth speak about tobacco: results of focus group discussions with school students. Health Educ Behav Off Publ Soc Public Health Educ. 2005;32: 363–379.](https://www.zotero.org/google-docs/?xc52M9)

Perry CL, Stigler MH, Arora M, Reddy KS. Prevention in translation: tobacco use prevention in India. Health Promotion Practice. 2008 Oct;9(4):378-86.

[Stigler MH, Perry CL, Arora M, Shrivastav R, Mathur C, Reddy KS et al. Intermediate outcomes from Project MYTRI: mobilizing youth for tobacco-related initiatives in India. Cancer Epidemiol Biomark Prev. 2007;16: 1050–1056.](https://www.zotero.org/google-docs/?xc52M9)

# 3) Table S1: Characteristics of included studies (n = 23)

| **Study IDs &  Location** | **Study details** | **School settings**  **School type**  **Total number of schools**  **School level** | **Population details**  **% of boys**  **Age of included participants in years** | **Funding & Trial registration** | **Outcomes measured** |
| --- | --- | --- | --- | --- | --- |
| Ahmed et al., 2023 a  (Ahmed et al., 2022, Ahmed et al., 2023b)  - Dhaka, Bangladesh | - c-RCT  - 2 arms  - Single site  - March 2019 - June 2019 | - Settings: Urban  - School type Public & private l  - Total schools: NR  - School level: 8th & 9th grades (secondary schools) | - Interested adolescent  - n = 320, Boys: 58.75%  - Age: 14.42 (1.15) in Intervention &  14.18 (0.89) in control | No funding support ACTRN12619000091101 | - Fresh fruit, vegetables and carbonated soft drinks intake  - Depressive symptoms  - Life satisfaction |
| Anjana et al., 2025  - Chennai, India | - c-RCT  - 2 arms  - Single site  - August 2022 | - Settings: NR  - School type: NR  - Total schools: 2  - School level: Grade 7 to 9 | - Adolescent girls  - n = 108, Boys: 0%  - Age: 13-15 y, Mean (SE): 12.6 (0.1) in intervention & 12.6 (0.1) in control | - Department of Health and Social Care (DHSC), The Foreign Commonwealth & Development Office (FCDO), Department for International Development (DFID, The Medical Research Council (MRC), The National Institute for Health Research (NIHR), Wellcome, UK  - CTRI/2020/02/023384 | - Primary outcome: step counts  - Secondary outcomes: metabolic, clinical, and lifestyle parameters  - Barriers and acceptability |
| Bandyopadhyay et al., 2025  -West Bengal, India | - RCT  - 2 arms  - Single site  - February -May (year NR) | - Settings: NR  - School type: NR  - Total school: 1  - School level: NR | - Obese school boys  - n = 30, Boys: 100%  - Age: 10-13 y, Mean (SD): 11.92 (1.02) (intervention) & 12.03 (0.94) (control) | - UK Medical Research Council, Foreign Commonwealth and Development Office, Department of Health and Social Care  - ISRCTN17755448 | -Primary outcomes: Health-related fitness components such as cardiovascular endurance, flexibility, body composition, muscular strength, muscular endurance |
| Hamdani et al., 2024  Gujar Khan rural sub-district, Rawalpindi | - c-RCT  - 2 arms  - Single site  - Participant enrollment in November 2021 | - Settings: Rural sub-district  - School type: Public schools  - Total schools: 40  - School level: Grade 8 & 9 | - Adolescents who screened positive on self-reported Pediatric Symptom Checklist (score ≥28) and their caregivers  - n = 566, boys: 51.94%  - Age: 13-15 y, Mean (SD): 13·89 (0·75) (intervention) &, 13·85 (0·75) (control) | NR | - Primary outcome: Psychosocial distress  - Secondary outcome: Anxiety & depressive symptoms, somatic complaints, child's quality of life, child's insight into their problems and wellbeing, problem solving, perceived emotional support  - Caregiver reported secondary outcomes: Health-related QoL, cost of health service utilisation |
| Hossain 2025  - Dhaka, Bangladesh | - c-RCT  - 2 arms  - Single site  - April - July 2024 | - Settings: NR  - School type: NR  - Total schools: 8  - School level: Grade 8 & 9 | - Adolescents  - n = 1374, boys: 54.66%  - Age: 10-17 y | - Commonwealth Scholarship Commission in the UK  - NCT06399588 | - Primary outcomes: Feasibility  - Secondary outcomes: Change in intention to initiate tobacco use, Health and well-being, Knowledge about tobacco and health, Attitudes towards tobacco and health, Belief about tobacco and health, Skills for a tobacco-free healthy lifestyle |
| Kaur et al., 2024  (Kaur et al., 2022, Kaur et al., 2026)  - Union Territory of Chandigarh, India | - c-RCT  - 2 arms  - Single site  - May 2018 - April 2021 | - Settings: NR  - School type: Public schools  - Total schools: 12  - School level: Grade 8 | - Early adolescents and their parents and teachers below 65 years  - n = 462, Boys: 54.76%  -Age: 10-15 y | - Partial funding from the George Institute for Global Health, Hyderabad, India, Senior research fellowship from University Grants Commis sion under NET-JRF scheme  - CTRI/2019/09/021452 | - Primary outcome: Changes in dietary behaviours, salt intake, sugar intake, fruits and vegetable intake, physical activity, metabolic equivalents for parents and teachers, tobacco and alcohol (current tobacco and alcohol  users)  - Secondary outcome: Changes in BMI,, systolic blood pressure, diastolic blood pressure, and excretory urinary salt  - Outcomes listed in Kaur et al., 2026  Primary outcome: Change in adolescents energy intake of ultra-processed, processed and minimally or unprocessed foods |
| Leventhal et al., 2015b  (Leventhal et al., 2015a)  - Bihar, India | - RCT  - 4 arms  - Single site  - 2023 | - Settings: Rural  - School type: Public  - Total schools: 76  - School level: 7- 8th standard (Middle-school girls) | - Adolescent girls  - n = 2732, Boys: 0%  - Age: 9-18 y, Mean (SD): 13.01 (1.16) (intervention), 12.94 (1.18) (control) | - Grant from the David & Lucile Packard Foundation  - NR | - Primary outcomes: Emotional resilience, self-efficacy, and social-emotional assets.  - Secondary outcomes: psychosocial well-being, depression & anxiety, social well-being |
| Mahajan et al., 2020  - Shimla, India | - cRCT  - 2 arms  - Single site  - 2017 and 2019 | - Settings: NR  - School type: Public & private  - Total schools: 12  - School level: Senior secondary school | - Adolescents  - n = 3707, Boys: 49.37%  - Age: 13-18 y, Mean (SD): 14.8(1.3) (intervention), 15.2(1.3) (control) | - Department of Health Research, New Delhi,India  - CTRI/2018/01/011312 | - Knowledge of healthy lifestyle/nutrition, dietary practices, physical activity, screen time, alcohol and tobacco use, anthropometric measures (BMI, waist/hip ratio, body fat %), biochemical parameters (lipid profile, fasting glucose) |
| Mall & Bhagyalaxmi, 2017  - Gandhinagar, India | - RCT  - 2 arms  - Single site  - Feb 2013 – Feb 2014 | - Settings: Rural  - School type: Public  - Total schools: 20  - School level: 6th to 9th grade (Secondary schools) | - Adolescents  - n = 824, Boys: 58.98%  - Age: NR | - Government of Gujarat  - NR | - Smokeless tobacco consumption of any form (Pan masala consumption, Gutkha consumption, Smoking tobacco, Passive smoking) |
| Moitra et al., 2021  - Mumbai, India | - RCT  - 2 arms  - Single site  Period NR | - Settings: Urban  - School type: Private & aided schools  - Total schools: 4  - School level: Grade 6 and 7 (Secondary level) | - Adolescents  - n = 518, Boys: 51.93%  - Age: 10-12 y | - NR  - NR | - Primary outcomes:  Change in knowledge, attitudes, and practices (KAP) related to healthy eating habits and physical activity among adolescents.  - Secondary / specific outcomes:  Improvements in Health Belief Model (HBM)constructs (perceived benefits, barriers, self‑efficacy), changes in dietary behaviours, & changes physical activity levels and sedentary behaviour. |
| Nayak & Bhat 2016  - Karnataka, India | -RCT  - 2 arms -Single site  -Aug 2009 - Feb 2010 | - Settings: NR  - School type: NR  - Total schools: 10  - School level: Secondary & higher secondary schools | - Obese children (BMI >85th percentile for age and sex)  - n = 251 , Boys: NR  - Age: 10-16 y | - NR  - NR | - Anthropometric measurements, lifestyle modifications, self-esteem |
| Patel et al., 2020 - Gujarat, India | - RCT  - 3 arms  - Single site  -Period NR | - Settings: Rural  - School type: Public  - Total schools: 1  - School level: NR | - Boys  - n = 108, Boys: 100%  - Age: 12-18 y | - NR  - NR | - Tobacco consumption frequency, gingival index status, dental stains in anterior and posterior teeth |
| Perry et al., 2009 (Mishra et al., 2005, Perry et al., 2006, Stingler et al., 2007) - Delhi & Chennai, India | - RCT (matched)  - 2 arms -Multi sites  -2004 - 2006 | - Settings: Urban - School type: Private & Public  - Total schools: 32  - School level: Grade 6 & 8 | - Adolescents  - n = 11642, Boys: 54.85%  - Age: 10-16 y, Mean: 11.2 (intervention), 12.9 (control) | - Fogarty International Center, National Institutes of Health  - NR | - Self-reported use of cigarettes, bidis (small hand-rolled, often flavored, cigarettes), and chewing tobacco and future intentions to smoke or use chewing tobacco |
| Ponnambalam et al., 2022  - Puducherry, India | - RCT  - 2 arms  - Single site  -Period NR | - Settings: Urban  - School type: Private schools  - Total schools: 4  - School level: NR | - Overweight adolescents  - n = 280, Boys: 46.79%  - Age: 11-14 y | - No funding support  - NR | - Primary outcomes: BMI and waist circumference/height ratio |
| Rao et al., 2023  (Rao et al., 2019 )  Mangalore, India | - RCT  - 2 arms  - Single site  -Period NR | - Settings: NR  - School type: NR  - Total schools: 2  - School level: NR | - Adolescents exposed to secondhand smoking  - n = 60, Boys: 55%  - Age: 12 y | - Department of Science  and Technology (DST) Government of India  - CTRI—09/015706 | - Knowledge, attitude, avoidance behavior and self-efficacy of avoidance of tobacco  - Second hand smoking (Salivary cotinine levels) |
| Rentala et al., 2019  - Karnataka, India | - RCT  - 2 arms  - Single site  -Aug 2017 - Jun 2018 | - Settings: Rural & urban  - School type: NR  - Total schools: NR  - School level: Pre-university or university course | - Adolescent girls with scores above 14 for the Depression, Anxiety, and Stress Scale  - n = 230, Boys: 0%  - Age: 16-18 y, Mean (SD): 17.65 (0.65) (intervention), 17.97 (0.57) (control) | Research grant from Indian Council of Social Science Research  - NR | - Academic stress, depression, anxiety, well-being |
| Rizvi et al., 2022  - Karnataka, India | - RCT  - 2 arms  - Single site  -2017 - 2018 | - Settings: NR  - School type: Government aided & private schools  - Total schools: 6  - School level: 8th grade | - Adolescents in English medium schools  - n = 398, Boys: 51.76%  - Age: NR | - No funding support  - NR | - Knowledge, Attitude and Practices (KAP) regarding physical activity and diet, BMI, Total body fat (%) |
| Rozi et al., 2019  - Karachi, Pakistan | - RCT  - 2 arms  - Single site  -Sep 2017 - Nov 2017 | - Settings: NR  - School type: Public & private  - Total schools: 18  - School level: grades 6 - 10 (secondary level) | - School going boys and girls  - n = 1327, Boys: 59.98%  - Age: Mean (SD): 14.19 (0.06) (intervention), 14.24 (0.06) (control) | - NR  - NCT03418506 | - Primary outcome: Knowledge about hazards of smokeless tobacco (SLT)  - Secondary outcomes were attitude and perception about hazards of SLT, and intention to quit SLT |
| Saraf et al., 2015  - Haryana, India | - c-RCT  - 2 arms  - Single arm  -Dec 2008 - Feb 2010 | - Settings: Rural  - School type: Public & private  - Total schools: 40  - School level: 6th & 7th grades (Middle school children) | - Adolescents  - n = 2348, Boys: NR  - Age: Mean (SD): 12.5 (1.08) (intervention), Female (12.3 (1.11) (control) | - All India Institute of Medical Sciences, New Delhi  - CTRI/2012/08/002882 | - Main outcome measures were knowledge and behavioral changes in physical activity, diet and tobacco |
| Singh et al., 2025a  - Budhanilkantha municipality and Kathmandu metropolitan city, Nepal | - c-RCT  - 2 arms  - Multi sites  -April 2024 - May, 2025 | - Settings: Urban  - Type of school: Public schools  - Total schools: 8  - School level: Secondary schools | - Adolescents with positive screen on the 8-item poverty screening instrument, not identified as having depression or anxiety  - n = 229, Boys: 49.34%  - Age: 13 & 15 y, Mean (SD): 13.8 (0.76) (combined intervention arm), 13.78 (0.72) (control) | - National Institute for Health Research (NIHR) (using the UK’s Official Development Assistance (ODA) Funding) and Department of Health and Social Care (DHSC) Wellcome Partnership for Global Health Research  - ISRCTN14601588 | - Primary outcomes: Depressive symptoms and anxiety symptoms - Secondary outcomes: Internal resilience and external resilience |
| Singhal et al., 2010  (Singhal et al., 2011)  - North India, India | - RCT (Matched)  - 2 arms  - Single site  -May 2008 - Jan 2009 | - Settings: NR  - School level: NR  - Total schools: 2  - School level: 11th grade | - Adolescents  - n = 209, Boys: 59.81% - Age: 15–17 y, Mean (SD): 16.04 (0.41) (intervention), 16.0 (0.5) (control) | - World Diabetes Foundation, Denmark  - NR | - Primary outcome: BMI, Height, Weight, WC, hip circumference as well as triceps and biceps skinfold thickness, mid-thigh circumference, mid-upper arm circumference and sagittal abdominal diameter  - Secondary outcomes: Body composition assessment, knowledge, attitude and practices, body image satisfaction surveys, Biochemical measurements (Surrogate markers of insulin resistance, b-cell function, disposition index, and subclinical inflammation) |
| Srivastav et al., 2021  (Srivastav et al., 2024, Srivastav et al., 2025)  - Udupi, India | - RCT  - 3 arms  - Single site  -Period NR | - Settings: NR  - School type: Public & private  - Total schools: 9  - School level: Primary & secondary | - Adolescents with BMI more than 85th percentile, must pass health screening using Physical Activity Readiness for Everyone (PAR-Q+)  - n = 604, Boys: 63.41%  - Age: 11-16 y, M (SD):  A multifactorial intervention: 12.7 (1.3), Exercise-only intervention: 13.1 (1.2),  13.1 (1.4) (control) | - No funding support  - CTRI/2019/04/018834 | - Primary outcome: Physical Activity Scores, Body mass index  - Secondary outcome: Health related quality of life |
| Thakur et al., 2016  - Union Territory of Chandigarh, India | -RCT  - 2 sites  - Single site  -Pedior NR | - Settings: NR  - School type: Public & private  - Total schools: 4  - School level: Grade 8 and 9 | - Adolescents  - n = 462, Boys: 70.78%  - Age: Mean (SD): 13.3 (0.8) (intervention),  13.5 (0.7) (control) | - Indian Council of Medical Research  - NR | - Primary outcome: Anthropometric measurements such as weight, BMI, skinfold thickness and waist and hip circumference  - Secondary outcome: Biochemical parameters, physical activity and dietary intake |

NR: Not reported

# 4) Table S2: Intervention details (n = 23)

| **Study IDs**  **Country Location** | **Intervention name**  **Intervention component** | **Theoretical/conceptual framework** | **Intervention description** | **Intervention provider**  **Delivery mode: Individual/ group; in-person/online**  **Settings**  **Beneficiary** | **Overall duration of intervention**  **Frequency of intervention**  **Dose: Session duration** |
| --- | --- | --- | --- | --- | --- |
| Ahmed et al., 2023 a  (Ahmed et al., 2022, Ahmed et al., 2023b)  - Dhaka, Bangladesh | - Health educational intervention  &  Physical activity intervention  - Multicomponent intervention | WHO's Health Promoting Schools framework | - Physical activity intervention: 30 min of supervised circuit session and 20 min supervised lunch time sports activity  - Classroom education session: Health education session on sedentary and healthy eating behaviours and classroom activities  - Teachers in the intervention school were requested to ask vendors around the school to stop selling unhealthy food.  - Schools and students were given educational materials with pictorial messages  - Parents were given infographics with messages related to healthy foods and active lifestyles. | - Researcher delivered  - Face to face  - School based group intervention  - Beneficiary: Adolescents, parents | - Total duration: 3 months  - Frequency: Weekly basis  - Session duration: 30 min classroom circuit session & 20 min supervised lunch time sports activity  - Total session: NR |
| Anjana et al., 2025  - Chennai, India | - Physical activity intervention called “Taking High-Intensity Interval Training (HIIT) ANd Dance to Adolescents for Victory over noncommunicable diseases (NCDs)” (THANDAV)  - Single component intervention | NR | **-** THANDAV is a 10-min routine with high- and low-intensity dance steps consists of four songs.  - Each song has a two-minute high-intensity component followed by a 30-second low-intensity component. This was repeated four times (4 songs) to form a single 10-minute routine.  - Dance routine had 10-minute warm-up, 40 minutes of THANDAV routine practice, and a 10-minute cool-down. | - Professional dancer/ trainer delivered  - Face to face session followed by online- Zoom session  - School based group intervention  - Beneficiary: Adolescent girls | - Total duration: 3 months  - Frequency: Twice in a week, Weekly make-up session on Saturdays  - Session duration: Each session for an hour  - Total sessions: Total 24 sessions in 12 weeks (16 offline sessions over 8 weeks, 8 online sessions over 4 weeks) |
| Bandyopadhyay et al., 2025  -West Bengal, India | - Physical activity intervention  &  Nutrition education session (NES)  - Multicomponent intervention | NR | **-** Physical Activity Sessions (PAS): Supervised exercise sessions after school. Each session consisted of a 10-minute warm-up and 35 minutes of aerobic activity, 15 minutes of recreational leisure activities and 5 minutes of cooling-down exercises .  - Nutrition Education Sessions (NES) was conducted by by a trained nutritionist on Saturdays.  - Lessons focused on encouraging healthy food choices and exercise self-control, covering dietary groups, the food pyramid, balanced diets, the link between exercise and health. | - Research team & trained nutritionalist delivered  - Face to face  - School based group intervention  - Beneficiary: Adolescents | - Total duration: 3 months  - Frequency: 4 days in a week (PAS) & One day in a weekly (NES)  - Session duration: 40-64 min (PAS), 30 min session (NES)  - Total sessions: 48 *PAS) & 12 (NES) |
| Hamdani et al., 2024  - Gujar Khan rural sub-district, Rawalpindi | - Psychoeducational intervention named “Early Adolescent Skills for Emotions (EASE)”  - Multiple component intervention | NR | - Psychoeducational intervention**:** Psychoeducation, problem solving, stress management, behavioural activation, and relapse prevention intervention for adolescents)  - Caregiver sessions involved psychoeducation, active listening, quality time, praise, caregiver self-care, and relapse prevention  - Home practice of the EASE strategies was encouraged between sessions for both adolescents and caregivers.  - Weekly supervision by trained supervisors, who were mental health specialists | - Primary facilitator1 and a cofacilitator delivered intervention  - Face to face  - School based group intervention  - Beneficiary: Adolescents and their caregivers | - Total duration: 3 months  - Frequency: Weekly basis  - Session duration: 90 min (adolescent) & 90 (caregiver)  - Total sessions: 7 week (adolescent) & 3 week (caregiver) |
| Hossain 2025  - Dhaka, Bangladesh | - Health educational intervention called “Intervention for Adolescent Tobacco Initiation  Prevention (IATIP)”  - Multi component intervention | Behaviour Change Wheel (BCW) framework | - Health educational intervention: Interventions focused on knowledge, attitudes, and skills to resist tobacco use, complemented by mental well-being intervention components  - Various kinds of activities such as video presentation, group discussions & lectures, roleplaying, poster-content, practice sessions were carried-out | - Researcher delivered  - Face to face  - School based group intervention  - Beneficiary: Adolescents | - Total duration: 3 days  - Frequency: Daily basis  - Session duration: 40-minute per session  - Total session: 3 session |
| Kaur et al., 2024  (Kaur et al., 2022)  - Union Territory of Chandigarh, India | - Physical activity intervention & health education intervention  -Multicomponent intervention | Proceed-Precede Model used for planning, implementation, and evaluation helped design a pragmatic intervention | - Physical activity session: 30 min four times per week for adolescents  - Health promotion intervention: Interactive learning sessions for adolescents to teach practical skills such as reading nutrition labels, using teaspoons to measure sugar and salt and selecting healthier snacks like fruits and vegetables  - Teacher and parents: Educational classroom sessions for parents for parents and teachers.  - All participants received pamphlets on dietary behaviours related to balanced diet, reducing salt and sugar intake, increasing fruits and vegetables intake, physical activity, tobacco use and alcohol use | - Researcher delivered  - Face to face  - School based group intervention  - Beneficiary: Adolescents, parents & teachers | - Total duration: 6 months  - Frequency: 4 times a week (PA), Weekly once (interactive learning session)  - Session duration: 30 min (PA) & 30 min (interactive learning sessions for adolescents), 30 min (teachers & parents)  - Total sessions: 116 sessions (at each school), 4 sessions (teachers & parents) |
| Leventhal et al., 2015b  (Leventhal et al., 2015a)  - Bihar, India | - Health promotion intervention named "Girls First - Bihar"  - Multicomponent intervention | Resilience-based framework | **Health promotion intervention**  Arm 1: Resilience curriculum (RC) interventions to integrate methods from positive psychology, social-emotional learning, and life skills.  - Sessions included the following aspects: Listening skills, character strengths, life stories & goals, identifying emotions, worry, stress & fear, group problem solving, forgiveness & apologies, peace project, and review & celebrate.  Interventional arm 2: Adolescent physical health curriculum (HC)  Interventional arm 3: Combined curriculum (RC + HC)  **Training and supervision components**:  - RC training for facilitators (5-days initial training and a 3-day follow-up training)  - HC training (3-day initial training and a 3-day follow-up training)  - These trainings were developed in consultation with local staff with the goal of preparing facilitators to have adequate mastery of the curricula.  - Training for Master Trainers (MTs) (5 days to supervise and train program facilitators (PFs)), Master trainers provided facilitators with support, review and training every 2 weeks  Both MTs and PFs received a stipend.  **Intervention monitoring, standardization and adherence**  - Facilitators used training manuals during sessions to standardize intervention delivery. The manuals outlined the curriculum and session procedures.  - Master trainers monitored implementation monthly using observation protocols that assessed adherence to the manuals, delivery quality, and participant management. Facilitators needing additional support received refresher training. | - Women from local communities as program facilitators (PFs)2 & master trainers recruited for project delivered intervention  - Face to face  - School based group intervention  - Beneficiary: Adolescents | - Total duration: 5 months  - Frequency: Once in a week  - Session duration: 1 hour  - Total sessions: 23 sessions |
| Mahajan et al., 2020  - Shimla, India | - School based health behaviour intervention  - Multicomponent intervention | WHO Health Promoting Schools (HPS) framework | - School based health behavior intervention targeting nutrition behavior, physical activity, and tobacco and alcohol consumption.  - These were spread over days, weeks, and months for continuous positive reinforcement of healthy lifestyle behaviors.  - Teacher supervised daily modular teaching, weekly performance of home task activities, and group activities like poster making, etc.  - informative leaflets were distributed among students and parents periodically | - Trained nodal school teachers delivered  - Face to face  - School based group intervention  - Beneficiary: Adolescents, parents | - Total duration: NR  - Frequency: Daily ( teacher supervised modular teaching), fortnightly (FGDs & activities)  Monthly (classroom flip-over calendar displaying key messages)  - Session duration: NR  - Total sessions: NR |
| Mall & Bhagyalaxmi, 2017  - Gandhinagar, India | - Peer-led training program called  “Peer-led tobacco prevention program (ASSIST-like) using peer leaders”  - Multicomponent intervention | NR | - Peer-led training regarding the health hazards of smoking and smokeless tobacco consumption with the view to help other students quit tobacco.  - Peer leaders were trained by research team  - **Monitoring component**: Peer leaders were given a diary to track and maintain these day-to-day activities, creating a structured engagement process. | - Peer (adolescents) delivered  - Face to face  - School based group intervention  - Beneficiary: Adolescents | - Total duration: One time training  - Frequency: One day (initial) & retraining at one month, followed by ongoing informal daily peer interaction for one year.  - Session duration: NR  - Total sessions: 2 |
| Moitra et al., 2021  - Mumbai, India | - Health education intervention called “Health Eating and Activity Program for Schoolchildren (HEAPS)”  - Single component intervention | Health Belief Model | - Health education intervention called “Health Belief Model–driven nutrition education programme (HEAPS)” with weekly classroom sessions, interactive activities, physical activity promotion, and three parent education sessions to improve adolescents’ diet and activity behaviours. | - Researcher delivered  - Face to face  - School based group intervention  - Beneficiary: Adolescents & parents | - Total duration: 2 months  - Frequency: Once in a week  - Session duration: 50-60 min  - Total sessions: NR |
| Nayak & Bhat 2016  - Karnataka, India | - Health education intervention  & Physical activity intervention  - Multicomponent intervention | NR | **Health education intervention:** Awareness to parents in schools, information booklet to parents: meaning and causes, assessment, consequence and weight, reduction strategies and lifestyle modification  - **Physical activity intervention**: A video on aerobics displayed in school and children were trained in aerobics morning or after school hours according to the convenience of the parents and children on all working days under the supervision of physical education teacher | - Research team delivered  - Face to face  - School based group intervention  - Beneficiary: Adolescents & parents | - Total duration: 6 months  - Frequency: Daily  - Session duration: NR  - Total sessions: NR |
| Patel et al., 2020 - Gujarat, India | - Counseling intervention  - Multicomponent intervention | NR | - Individual Motivational Therapy (IMT) & Group Motivational Therapy (GMT)  - IMT: individual counselling, parent counselling, and reminder strategies  - GMT: Group counselling, audio video aids, powerpoints presentation | - Research team delivered  - Face to Face  - School based individual & group intervention  - Beneficiary: Adolescent boys | - Total duration: One time intervention  - Frequency of intervention: One time  - Session duration: NR  - Total sessions: NR |
| Perry et al., 2009 - Delhi & Chennai, India | - Project Mobilizing Youth for Tobacco-Related Initiatives in India (MYTRI)  - Multicomponent intervention | The conceptual model was guided by social cognitive theory (Baranowski, Perry, & Parcel, 1996) | - Intervention consisted of four components behavioral classroom curricula, school posters, a parental involvement component, and peer-led activism.  - Behavioral component consisted of seven peer-led classroom activities  - Peer leadership component focused on peer-led health activism outside of the classroom, including competitions between classrooms and schools.  - Postcards were given home to parents for parental involvement    **Training components**:  - Implementation of the intervention included the training of field staff, teachers, and peer leaders in each city at the beginning of both school years. There was also ongoing support in the schools as needed by field staff  - Professionals with master’s degrees in psychology, social work, sociology, or nutrition were recruited and trained as community coordinators. They acted as liaisons between investigators and implementers during program delivery, visiting schools to support teachers and peer leaders, distribute manuals and session materials, and provide brief activity-specific booster trainings before each session.  - Community coordinators observed and documented classroom sessions, collected feedback and attendance records, assisted with student outcome measures, and prepared school reports on factors affecting the tobacco prevention intervention [Goenka et al., 2010].  - A qualitative mediation analysis showed key mediating variables were students’ knowledge about tobacco, beliefs about tobacco, skills development, intentional beliefs, advocacy beliefs, and self-efficacy beliefs. [Bete et al., 2011] | - Research team, teachers, student peer leader delivered intervention  - Face to face  - School based group intervention  - Beneficiary: Adolescents, parents | - Intervention duration: 4 months  - Frequency: NR  - Session duration: 35-60 min (classroom sessions)  - Total sessions: 7 classroom sessions |
| Ponnambalam et al., 2022  - Puducherry, India | - Physical activity intervention  - Single component | NR | **After-school physical activity intervention**  - The after‑school structured physical activity intervention included aerobic workouts, muscle‑strengthening and bone‑strengthening activities.  - Initially the investigator conducted the exercises in the presence of the physical trainer and later, were supervised by the physical trainer.  - The researcher followed up with the study participants twice in a month. | - Physical trainer delivered  - Face to face  - School based group intervention  - Beneficiary: Adolescents | - Intervention duration: 9 months  Frequency of intervention: 5 days in a week  Session duration: 60 min per session  Total session: 150 (planned) |
| Rao et al., 2023  (Rao et al., 2019 )  Mangalore, India | - Health education intervention called  "Tobacco-Free" - Single component | NR | **“Tobacco-Free" - Health education intervention**  - “tobacco-free” intervention comprised a 40-min health education session, followed by reinforcement at 15 days  - Children were also given posters that contained messages on the effects of tobacco and how to make their homes smoke-free, to be placed in their homes | - Research team delivered  - Face to face  - School based group intervention  - Schools only  - Beneficiary: Adolescents | - Total duration: One time intervention & reinforcement at 15 days  - Frequency: One time intervention & reinforcement at 15 days  - Session duration: 40-min health  - Total sessions: NR |
| Rentala et al., 2019  - Karnataka, India | - Holistic stress management intervention  - Single component | BMS model originally developed by Chan et al | **Holistic stress management intervention**  - The holistic stress management program was implemented over eight sessions: (a) concept of holistic health; (b) understanding my own stress; (c) identifying stressors; (d) how do I respond to stress; (e) emotions and well‑being, (f) loving myself; (g) my growth and strength, support, and network; and (h) transformation of self.  - During each follow‑up, participants were encouraged and reinforced to practice holistic techniques along with routine follow‑up assessments. | - Research team delivered  - Face to face  - School based group intervention  - Beneficiary: Adolescents | - Total duration: 1 month  - Frequency: Two weekly sessions  - Duration: 90 - 120 minutes  - Total sessions: 8 sessions |
| Rizvi et al., 2022  - Karnataka, India | - Health education intervention  - Single component intervention | NR | **Health education intervention**  - A health education module delivered in the form of power‑point presentation including motivational pictures, phrases and videos to encourage participants to adapt a healthy lifestyle  - Module was reinforced during the second visit by distributing handouts and showing posters that included ways of living a healthy lifestyle to prevent obesity. | - Research team delivered  - Face to face  - School based group intervention  - Beneficiary: Adolescents | - Total duration: One time intervention, reinforced at 6 months  - Frequency: One time intervention, reinforced at 6 months  - Session duration: NR  - Total sessions: NR |
| Rozi et al., 2019  - Karachi, Pakistan | - Health education intervention  - Multicomponent intervention | NR | **Educational session intervention**  - Students were taught about the hazardous effects of Smokeless tobacco (SLT). Emphasis was also given on danger signs of oral cancer and different strategies of quitting SLT was also explained to the students  - Four weeks after the first intervention session, the students were reinforced for the hazardous effects of SLT  **Training component**  - A 2-day training program was conducted for programme providers by trained physicians.  - The training aimed to standardize intervention delivery and maximize programme impact across schools.  - It included programme overview, teaching methods, resource assessment, and expert knowledge sharing | - Program provider delivered  - Face to face  - School based group intervention  - Beneficiary: Adolescents | - Total duration: One time session & follow up at 4 week  - Frequency: One time session & follow up at 4 week.  - Session duration: 30 minutes  - Total sessions: NR |
| Saraf et al., 2015  - Haryana, India | - Health promotion intervention  - Multicomponent intervention | Closely resembled to social learning theory | **Health promotion intervention**  The intervention consisted of a  - School policies focused creating an enabling environment by formation of school health committee, school action plan, adoption of policies for physical activity, tobacco and healthy foods improving school environment.  - Classroom component (activities)- involving students in health-promoting activities  - Family/community component: Reaching out to the family/community through schools  - Holiday assignments, school rally, distribution of pamphlets list of healthy foods. Family orientation about NCDs during parent teacher association (PTA) meetings and annual function | - Research team delivered  - Face to face  - School and community based group intervention  - Beneficiary: Adolescents & community personnel | - Total duration: 8 months  - Frequency: NR  - Session duration: 45 min  - Total duration: NR |
| Singh et al., 2025a  - Budhanilkantha municipality and Kathmandu metropolitan city, Nepal | - Self-regulation intervention & physical activity intervention called  Improving adolescent mental health by reducing the impact of poverty (ALIVE)  - Multicomponent intervention | ALIVE conceptual framework, Developmental Systems Framework of resilience; adaptation-based resilience approach | **Multicomponent intervention** - Self-regulation intervention to enhancing the ability to set goals, manage the emotional impact of failure, and adjust behavior to achieve those goals, among adolescents. These interventions included combined **group physical activity (martial arts-based)**, caring facilitators/peer support, positive self-concept building (goal-setting, emotion regulation), 4 phases (caring behaviours, strong connections/minds/future).  - Economic intervention: Cash transfers (NPR2000/adolescent 6x), financial literacy (budget/save/track), negotiation skills, delivered in 3 phases.  - Combined intervention (self-regulation and economic) | - Trained facilitators (with psychology /business backgrounds)  - Face to face  - School based group intervention  - Beneficiary: Adolescents | - Total duration: 1 month  - Frequency: NR  - Duration: 90 min (self-regulation & economic intervention session), 2 hr 15 min (combined intervention session)  - Total sessions: 20 |
| Singhal et al., 2010  (Singhal et al., 2011)  - North India, India | - Nutrition education intervention  -Multicomponent intervention | The model was developed based on the Dietary Guidelines for  Indians (Krishnaswamy et al., 1998) | **School-Based Nutrition Education and Lifestyle Interventions**  - Nutrition education included delivery of health related information, lifestyle diseases awareness through lectures and FGDs. Promotion of physical activity in school every week for at least 30 min.  - Student volunteers were trained with instructions to disseminate the health messages  - Individual counseling session, policy-level changes in the school wherein the school canteen menu was changed to healthier alternatives  - Teachers and parents: Involvement of teachers and parents through health camps where they were given free of cost health examinations.  - Student volunteers were trained with instructions to disseminate the health messages to their peers. | - Research team delivered  - Face to face  - School based individual & group intervention  - Beneficiary: Adolescents, teachers & parents | - Total duration: 6 months  - Frequency: Once in a week  - Session duration: 30 min session (health education) &  30 min (physical activity sessions)  - Total sessions: NR |
| Srivastav et al., 2021  (Srivastav et al., 2024, Srivastav et al., 2025)  - Udupi, India | - Physical activity intervention  &  Health education intervention  - Multicomponent intervention | The Theory of Planned Behaviour | **Physical activity intervention & Health education intervention**  - **Arm 1**: Multifactorial intervention (MFI): The MFI group received physical activity (PA) and dietary education, plus parental education on healthy lifestyles.  - PA was delivered under the supervision of a physiotherapist and PE teacher.  - Aerobic exercises (e.g. running, jogging, brisk walking) and strengthening exercises (e.g. tug of war, body weight resistance exercises) were part of each session.  - **Arm 2**: Exercise only: School‑based exercise only during PE classes under the supervision of a physiotherapist and PE teacher intervention | - Physiotherapist and PE teacher  - Face to face  - Group-based  - Schools only  - Beneficiary: Adolescents & parents | - Total duration: 3 month  - Frequency: Twice weekly (MFI- PA)  - Duration 60 min per session  - Intensity: Moderate to high-intensity aerobic and strengthening exercises guided by PCERT scale, based on heart rate/breathing (MFI arm)  - Total sessions: 24 sessions (MFI- PA) |
| Thakur et al., 2016  - Union Territory of Chandigarh, India | - Health educational intervention  - Multicomponent intervention | NR | - School-based Lifestyle Intervention Package including fortnight health education sessions at school in the form of interactive sessions and audio-visual displays.  - Maintenance of lifestyle diaries in which the child’s daily diet and physical activity were self-recorded.  - Suitable dietary recommendations to the parents for the diet of their children, prepared in accordance with the guidance of the dietician.  - Ensuring one period of physical activity at school daily.  - Active involvement of teachers in health assessment and parent Teachers’ Association. | - Trained facilitators including dieticians and pediatricians  - Face to face  - School based group intervention  - Beneficiary: Adolescents, parents | - Total duration: 5 months  - Frequency: Fortnight sessions  - Duration of session: NR  - Total sessions: NR |

1 Facilitators were non-specialist school counsellors with graduate degrees in psychology

2Program facilitators are women aged 18 years old from the local community with 10th grade education who provided intervention

3 The conceptual model was guided by social cognitive theory (Baranowski, Perry, & Parcel, 1996) and included intrapersonal, social-contextual, and environmental factors that were thought to be predictive of tobacco use in urban Indian population, as well as being modifiable factors. The factors that were selected were also the basis of the social influences model that has guided many of the effective smoking prevention programs in the United States

# 5) Table S3: Intervention components

| Study ID | Intervention components | Physical activity | Health Education | Stress management, counselling | Policy changes | Other |
| --- | --- | --- | --- | --- | --- | --- |
| Ahmed et al., 2023a | Multicomponent | x | x |  | x |  |
| Anjana et al., 2025 | Single | x |  |  |  |  |
| Bandyopadhyay et al., 2025 | Multicomponent | x | x |  |  |  |
| Hamdani et al., 2024 | Multicomponent |  | x | x |  |  |
| Hossain 2025 | Multicomponent |  | x |  |  |  |
| Kaur et al., 2024, (Kaur et al., 2022) | Multicomponent | x | x |  |  | x |
| Leventhal et al., 2015b  (Leventhal et al., 2015a) | Multicomponent |  | x | x |  |  |
| Mahajan et al., 2020 | Multicomponent |  | x |  |  |  |
| Mall & Bhagyalaxmi, 2017 | Multicomponent |  | x |  | x | x |
| Moitra et al., 2021 | Single |  | x |  |  |  |
| Nayak & Bhat 2016 | Multicomponent | x | x |  |  |  |
| Patel et al., 2020 | Multicomponent |  |  | x |  |  |
| Perry et al., 2006 | Multicomponent |  | x |  |  | x |
| Ponnambalam et al., 2022 | Single | x |  |  |  |  |
| Rao et al., 2023  (Rao et al., 2019 ) | Single |  | x |  |  |  |
| Rentala et al., 2019 | Single |  |  | x |  |  |
| Rizvi et al., 2022 | Single |  | x |  |  |  |
| Rozi et al., 2019 | Multicomponent |  | x |  |  |  |
| Saraf et al., 2015 | Multicomponent |  | x |  | x |  |
| Singh et al., 2025a | Multicomponent | x |  | x | x | x |
| Singhal et al., 2010  (Singhal et al., 2011) | Multicomponent |  | x |  |  |  |
| Srivastav et al., 2021  (Srivastav et al., 2024, Srivastav et al., 2025) | Multicomponent | x | x | x |  |  |
| Thakur et al., 2016 | Multicomponent |  | x |  | x |  |
|  |  | 8 | 18 | 6 | 5 | 4 |
